# Supplementary material for: Community-based health care is an essential component of a resilient health system: evidence from Ebola outbreak in Liberia
Source: BMC Public Health. 2017 Jan 17;17:84. doi: 10.1186/s12889-016-4012-y (PMC5240441; doi:10.1186/s12889-016-4012-y)
Supplement: Additional file 3: — gCHV Survey Data. This is the raw data collected during the CHW survey. (XLSX 32 kb) [file 12889_2016_4012_MOESM3_ESM.xlsx]

## Sheet: Liberia_gCHVsurveydata
UniqueKey	SurveyDate	County	Sex	YearsCHV	TrainICCM	TrainedCBHFA	Diarrhea	Malaria	None	Pneumonia	Malnutrition	ServicesTrend	IncrWhy1Fear	IncrWhy2nostaff	IncrWhy3nomeds	IncrWhy4closedHF	IncrWhy5HFtoofar	IncrWhy6transport	IncrWhy7valueCHV	IncrWhyOther	WhyIncrOthSpecify	DecrWhy1fear	DecrWhy2tradhealer	DecrWhy3hometx	DecrWhy4notrustCHV	DecrWhyOther	DecrWhyOthSpecify	Drugs4Diarrhea	Drugs4Pneumonia	Drugs4Malaria	NowDiarrheaDrugs	NowDrugsPneumonia	NowDrugsMalaria	SupVisits	DrugProvider	ReferralAdvice	FxnHFrating	SuperVisitMOH	SuperVisitRedCross	SuperVisitOtherNGO	SuperVisitOther	SuperVisitOthSpecify	AwareNoTouch	N5WhendidyoufirsthearabouttheNot	NoTouchHearWhen	MOHStaff	chc	MediaradioTVposters	RedCrossProject
8	2015-02-19	Bomi	male	3	1	0	1	1	0	1	0	decreased	0	0	0	0	0	0	0	0		0	0	0	0	1	Ebola awareness from gCHV	1	1	0	1	1	1	0	0	1	5	0	0	0	0		1	March	3	1	0	0	1
22	2015-02-20	Gbporlu	female	4 5mo	1	0	1	1	0	1	1	decreased	0	0	0	0	0	0	0	0		0	0	0	1	0		0	0	0	0	0	1	1	0	2	1	0	1	0	0		1	2015-01-01	13	1	0	0	1
28	2015-02-20	Gbporlu	male	4	1	1	1	1	0	1	0	decreased	0	0	0	0	0	0	0	0		0	0	0	0	1	Lack of drugs	0	0	0	1	1	0	1	0	2	4	0	1	0	0		1	June	6	0	0	1	1
7	2015-02-19	Bomi	female	2 2mo	1	1	1	1	0	1	0	decreased	0	0	0	0	0	0	0	0		1	0	0	0	0		1	1	0	1	1	0	1	0	0	4	0	1	0	0		1	Oct	10	1	0	0	0
51	2015-02-23	Grand Jeden	male	9	1	0	1	1	0	1	1	decreased	0	0	0	0	0	0	0	0		0	0	0	0	1	Lack of drugs.	0	0	0	1	1	1	1	0	1	5	0	1	0	0		1	July	7	0	0	1	0
57	2015-02-23	Grand Jeden	male	4	1	0	1	1	0	1	1	decreased	0	0	0	0	0	0	0	0		1	0	0	0	0		1	1	0	1	0	1	1	0	2	5	0	1	0	0		1	Sept	9	1	0	0	1
9	2015-02-19	Bomi	male	2	1	0	1	1	0	1	0	decreased	0	0	0	0	0	0	0	0		0	0	0	0	1	Full awareness was provided the gCHV.	1	1	0	1	1	0	1	0	1	1	1	0	0	0		1	Aug	8	1	0	0	0
36	2015-02-23	Grand Jeden	female	3	1	0	1	1	0	1	0	decreased	0	0	0	0	0	0	0	0		1	0	0	1	1	People feared gCHV will infect them with Ebola.	0	0	0	1	1	1	1	0	2	2	1	1	0	0		1	Oct	10	1	0	0	1
18	2015-02-19	Bomi	male	9	1	1	1	1	0	1	1	decreased	0	0	0	0	0	0	0	0		1	0	0	0	0		0	0	0	0	0	0	1	4	1	2	0	1	0	0		1	Sept	9	0	0	1	0
21	2015-02-19	Bomi	male	1	1	1	1	1	0	1	0	decreased	0	0	0	0	0	0	0	0		1	0	0	0	0		0	0	0	0	0	0	1	0	2	1	0	1	0	0		1	June	6	0	0	0	1
30	2015-02-20	Gbporlu	male	4	1	1	1	1	0	1	0	decreased	0	0	0	0	0	0	0	0		1	0	0	0	0		0	0	0	1	0	1	1	0	1	4	0	1	0	0		1	Aug	8	1	0	0	1
15	2015-02-19	Bomi	female	8	1	1	1	1	0	1	0	same	0	0	0	0	0	0	0	0		0	0	0	0	0		1	1	0	1	0	1	1	0	5	1	1	1	0	0		0
16	2015-02-19	Bomi	male	9	1	1	1	1	0	1	1	decreased	0	0	0	0	0	0	0	0		0	0	1	0	0		0	0	0	0	0	0	1	4	2	1	0	1	0	0		1	Aug	8	0	0	0	0
60	2015-02-20	Gbporlu	male	1	1	0	1	1	0	1	0	decreased	0	0	0	0	0	0	0	0		1	0	0	0	0		1	1	0	0	0	1	1	0	2	5	1	1	0	0		1	Sept	9	1	0	0	1
26	2015-02-20	Gbporlu	male	3	1	1	1	1	0	1	0	decreased	0	0	0	0	0	0	0	0		1	0	0	1	0		1	1	0	0	0	1	1	0	1	1	1	0	0	0		1	Oct	10	1	0	0	1
5	2015-02-19	Bomi	male	10	1	0	1	1	0	1	0	decreased	0	0	0	0	0	0	0	0		1	0	0	0	0		0	0	0	0	0	1	1	0	1	1	0	1	0	0		1	Dec	12	0	0	0	1
10	2015-02-19	Bomi	male	17	1	1	1	1	0	1	0	decreased	0	0	0	0	0	0	0	0		0	0	0	0	1	I was scared.	1	1	0	0	0	1	1	0	5	3	0	1	0	0		1	2015-01-01	13	0	0	0	1
55	2015-02-23	Grand Jeden	female	1	1	0	1	1	0	1	1	decreased	0	0	0	0	0	0	0	0		0	0	0	0	1	We were told not to treet sick people at home.	1	1	0	1	0	1	1	0	2	5	0	1	0	0		1			0	0	0	1
64	2015-02-20	Gbporlu	male	5	1	1	1	1	0	1	0	decreased	0	0	0	0	0	0	0	0		1	0	0	0	0		0	0	0	0	0	1	1	0	1	1	0	1	0	0		1	Aug	8	0	0	0	1
25	2015-02-20	Gbporlu	male	5 7mo	1	0	1	1	0	1	1	decreased	0	0	0	0	0	0	0	0		1	0	0	0	0		1	1	0	0	0	1	1	0	2	5	0	1	0	0		1	2015-01-01	13	0	0	0	1
27	2015-02-20	Gbporlu	male	1 2mo	1	0	1	1	0	1	0	decreased	0	0	0	0	0	0	0	0		1	0	0	0	0		0	0	0	0	0	1	1	0	1	1	0	1	0	0		1	2015-01-01	13	0	0	0	1
23	2015-02-20	Gbporlu	male	1 3mo	1	0	1	1	0	1	0	decreased	0	0	0	0	0	0	0	0		0	0	0	1	0		0	0	0	0	0	1	1	0	1	4	0	1	0	0		1	2015-01-01	13	1	0	0	1
24	2015-02-20	Gbporlu	male	1 5mo	1	0	1	1	0	1	0	decreased	0	0	0	0	0	0	0	0		1	0	0	1	0		1	1	0	0	0	1	1	0	1	4	0	1	0	0		1	2015-01-01	13	0	0	0	1
63	2015-02-20	Gbporlu	male	4	1	1	1	1	0	1	0	same	0	0	0	0	0	0	0	0		0	0	0	0	0		1	1	0	0	0	1	1	0	2	4	1	1	0	0		1	2015-01-01	13	0	0	0	1
33	2015-02-20	Gbporlu	female	1 4mo	1	0	1	1	0	1	0	decreased	0	0	0	0	0	0	0	0		0	0	0	0	1	Lack of drugs for treatment.	0	0	0	0	0	1	1	0	5	4	0	1	0	0		1	Sept	9	0	0	0	1
49	2015-02-23	Grand Jeden	male	7	1	0	1	1	0	1	0	same	0	0	0	0	0	0	0	0		0	0	0	0	0		0	0	0	1	1	0	1	0	2	5	1	1	1	0		1	June	6	0	0	0	1
59	2015-02-20	Gbporlu	male	5	1	0	1	1	0	1	0	decreased	0	0	0	0	0	0	0	0		1	0	0	0	0		1	1	0	1	0	1	1	0	2	1	1	1	0	0		1	Sept	9	1	0	0	1
20	2015-02-19	Bomi	male	1	1	1	1	1	0	1	0	increased	0	1	0	0	0	0	0	0		0	0	0	0	0		1	1	1	1	1	0	0	0	2	1	0	0	0	0		1	July	7	0	0	1	1
11	2015-02-19	Bomi	male	9	1	1	1	1	0	1	1	increased	0	0	0	1	0	0	0	0		0	0	0	0	0		1	0	0	0	0	0	1	0	5	1	1	0	0	0		1	Nov	11	1	0	0	1
50	2015-02-23	Grand Jeden	male	7	1	0	1	1	0	1	1	decreased	0	0	0	0	0	0	0	0		1	0	0	0	0		1	1	0	1	1	1	1	0	2	4	0	1	0	0		1	Aug	8	0	0	0	1
29	2015-02-20	Gbporlu	male	6mons	1	0	1	1	0	1	0	increased	0	0	0	0	0	0	0	1	Began work during the EVD outbreak.	0	0	0	0	0		0	0	0	1	0	1	1	0	2	4	0	1	0	0		1	Oct	10	0	0	0	0
14	2015-02-19	Bomi	male	14	1	1	1	1	0	1	1	increased	0	1	1	1	0	0	0	0		0	0	0	0	0		1	1	0	1	0	1	1	0	5	1	1	1	0	0		1	March	3	1	0	0	1
31	2015-02-20	Gbporlu	male	1	1	1	1	1	0	1	0	decreased	0	0	0	0	0	0	0	0		0	0	0	0	1	Illnesses under my supervision area decreased.	0	0	0	0	0	1	1	0	2	4	0	1	0	0		1	July	7	1	0	0	1
41	2015-02-23	Grand Jeden	male	3	1	0	1	1	0	1	1	decreased	0	0	0	0	0	0	0	0		1	1	1	1	0		1	0	0	1	1	1	1	0	2	2	1	1	0	0		1	Aug	8	1	0	1	1
35	2015-02-23	Grand Jeden	male	4	1	0	1	1	0	1	1	decreased	0	0	0	0	0	0	0	0		1	0	0	1	0		1	0	0	1	0	0	1	0	2	1	1	1	0	0		1	Oct	10	1	1	1	1
13	2015-02-19	Bomi	male	2	1	1	1	1	0	1	0	same	0	0	0	0	0	0	0	0		0	0	0	0	0		1	0	0	0	0	0	1	0	2	1	1	1	0	0		1	July	7	1	0	0	1
54	2015-02-23	Grand Jeden	female	7mns	1	0	1	1	0	1	0	same	0	0	0	0	0	0	0	0		0	0	0	0	0		1	1	0	1	1	1	1	0	1	5	1	0	0	0		1	Aug	8	1	0	0	1
56	2015-02-23	Grand Jeden	female	1	1	0	1	1	0	1	0	decreased	0	0	0	0	0	0	0	0		0	0	0	0	1	We were told not to treet sick people at home.	0	0	0	0	0	1	1	0	1	5	0	1	0	0		1	July	7	1	0	0	0
53	2015-02-23	Grand Jeden	male	1	1	0	1	1	0	1	0	increased	1	0	0	0	0	0	0	0		0	0	0	0	0		1	1	0	1	1	1	1	0	2	5	0	1	0	0		1	July	7	0	0	1	1
17	2015-02-19	Bomi	male	8	1	1	1	0	0	1	0	decreased	0	0	0	0	0	0	0	0		1	0	0	0	0		1	0	0	1	0	1	1	0	1	1	0	1	0	0		1	July	7	1	0	1	1
44	2015-02-23	Grand Jeden	male	9	1	1	1	1	0	1	0	decreased	0	0	0	0	0	0	0	0		1	0	1	0	0		1	1	1	1	1	1	1	0	2	2	1	1	1	0		1	Aug	8	1	0	0	1
40	2015-02-23	Grand Jeden	male	8	1	0	1	1	0	1	0	increased	1	0	0	0	0	0	1	1	Feared of being infected with Ebola virus.	0	0	0	0	0		1	1	1	1	1	1	1	0	1	2	1	1	0	0		1	Aug	8	0	0	0	1
32	2015-02-20	Gbporlu	male	1 4mo	1	1	1	1	0	1	1	increased	1	0	0	0	0	0	0	0		0	0	0	0	0		0	0	0	1	0	1	1	0	2	4	0	1	0	0		1	Sept	9	0	0	1	1
12	2015-02-19	Bomi	female	3	1	1	1	1	0	1	0	same	0	0	0	0	0	0	0	0		0	0	0	0	0		1	0	0	1	0	1	1	0	2	1	0	1	0	0		1	Aug	8	0	0	0	1
19	2015-02-19	Bomi	male	2	1	1	1	1	0	1	0	decreased	0	0	0	0	0	0	0	0		1	0	0	0	0		0	0	0	1	0	0	1	0	2	1	0	1	0	0		1	Aug	8	0	0	0	1
52	2015-02-23	Grand Jeden	female	1	1	0	1	1	0	1	0	decreased	0	0	0	0	0	0	0	0		0	0	0	0	1	No drugs.	1	1	0	0	0	1	1	0	2	5	1	1	0	0		1	July	7	1	0	0	1
43	2015-02-23	Grand Jeden	male	11	1	1	1	1	0	1	0	decreased	0	0	0	0	0	0	0	0		1	1	1	0	0		1	1	0	1	1	1	1	0	2	2	1	1	1	0		1	Dec	12	1	0	0	1
62	2015-02-20	Gbporlu	male	5	1	0	1	1	0	1	0	decreased	0	0	0	0	0	0	0	0		1	0	0	0	0		1	1	0	0	0	1	1	0	2	2	1	1	0	0		1	June	6	1	0	0	1
58	2015-02-23	Grand Jeden	female	3	1	0	1	1	0	1	0	decreased	0	0	0	0	0	0	0	0		1	1	0	1	0		1	1	0	1	0	1	1	0	2	2	0	1	0	0		1	Oct	10	1	0	0	1
34	2015-02-23	Grand Jeden	female	3	1	0	1	1	0	1	0	decreased	0	0	0	0	0	0	0	0		1	0	0	1	0		0	0	0	1	0	1	1	0	2	2	1	1	1	0		1	Aug	8	1	0	1	1
6	2015-02-19	Bomi	male	8	1	0	1	1	0	1	1	decreased	0	0	0	0	0	0	0	0		1	0	0	0	0		0	0	0	1	0	0	1	0	2	2	1	0	0	0		1	Aug	8	1	0	0	0
61	2015-02-20	Gbporlu	male	5	1	1	1	1	0	1	0	same	0	0	0	0	0	0	0	0		0	0	0	0	0		1	1	0	1	0	1	1	0	2	1	1	1	0	0		1	July	7	1	0	0	1
37	2015-02-23	Grand Jeden	male	2	1	1	1	1	0	1	0	increased	0	0	0	0	0	0	1	0		0	0	0	0	0		1	1	0	1	1	1	1	0	2	2	0	1	0	0		1	Dec	12	0	0	0	1
48	2015-02-23	Grand Jeden	male	6	1	1	1	1	0	1	0	decreased	0	0	0	0	0	0	0	0		1	0	0	0	0		1	1	0	1	1	1	1	0	2	3	1	1	0	0		1	Dec	12	1	0	0	1
45	2015-02-23	Grand Jeden	male	9	1	1	1	1	0	1	0	decreased	0	0	0	0	0	0	0	0		1	0	0	0	0		1	1	0	1	1	1	1	0	2	2	0	1	0	0		1	Dec	12	0	0	0	1
39	2015-02-23	Grand Jeden	male	2	1	0	1	1	0	1	0	increased	1	0	0	0	0	0	0	0		0	0	0	0	0		0	0	0	1	1	1	1	0	2	3	1	0	0	0		1	Dec	12	1	0	0	1
47	2015-02-23	Grand Jeden	male	3	1	1	1	1	0	1	0	decreased	0	0	0	0	0	0	0	0		1	0	0	0	0		1	1	0	1	1	1	1	0	2	2	0	0	1	0		1	Dec	12	0	0	0	1
46	2015-02-23	Grand Jeden	male	4	1	1	1	1	0	1	0	decreased	0	0	0	0	0	0	0	0		1	0	0	0	0		1	1	0	1	1	1	0	0	2	2	0	0	0	0		1	Dec	12	0	0	0	1
38	2015-02-23	Grand Jeden	male	5	1	1	1	1	0	1	0	decreased	0	0	0	0	0	0	0	0		1	0	0	0	0		1	1	0	1	1	1	1	0	2	2	0	1	1	0		1	Dec	12	0	0	1	1
42	2015-02-23	Grand Jeden	male	2	1	0	1	1	0	1	0	decreased	0	0	0	0	0	0	0	0		1	0	0	0	0		1	0	0	1	0	1	1	0	2	2	0	1	1	0		1	Dec	12	0	0	0	1
[truncated: 43 more columns]
